# Supplementary material
Source: ML conference proceedings conference paper supplement (https://openreview.net/forum?id=umHruATvCD)

iii. Cancer Biomarker Discovery

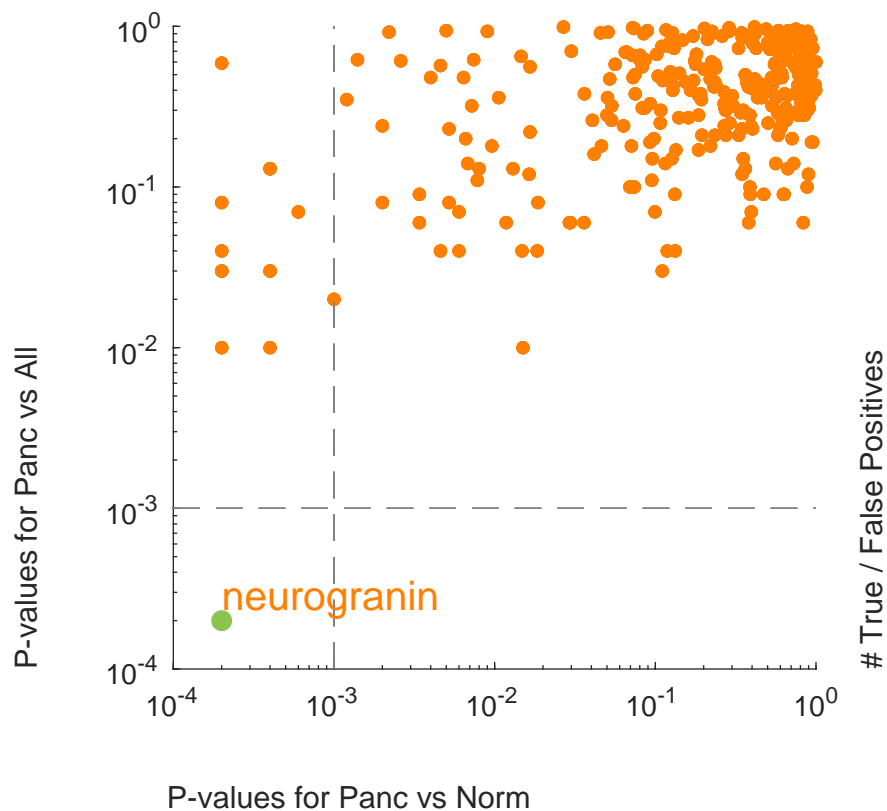

iv. Biomarker kNN Classification

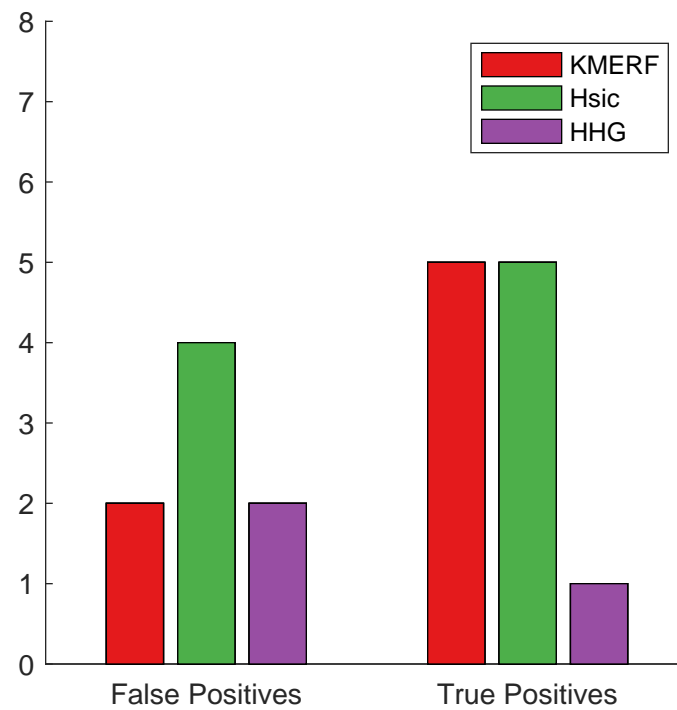

Supplement: supplementary_material [file attachment]

# Cancer Biomarker Discovery

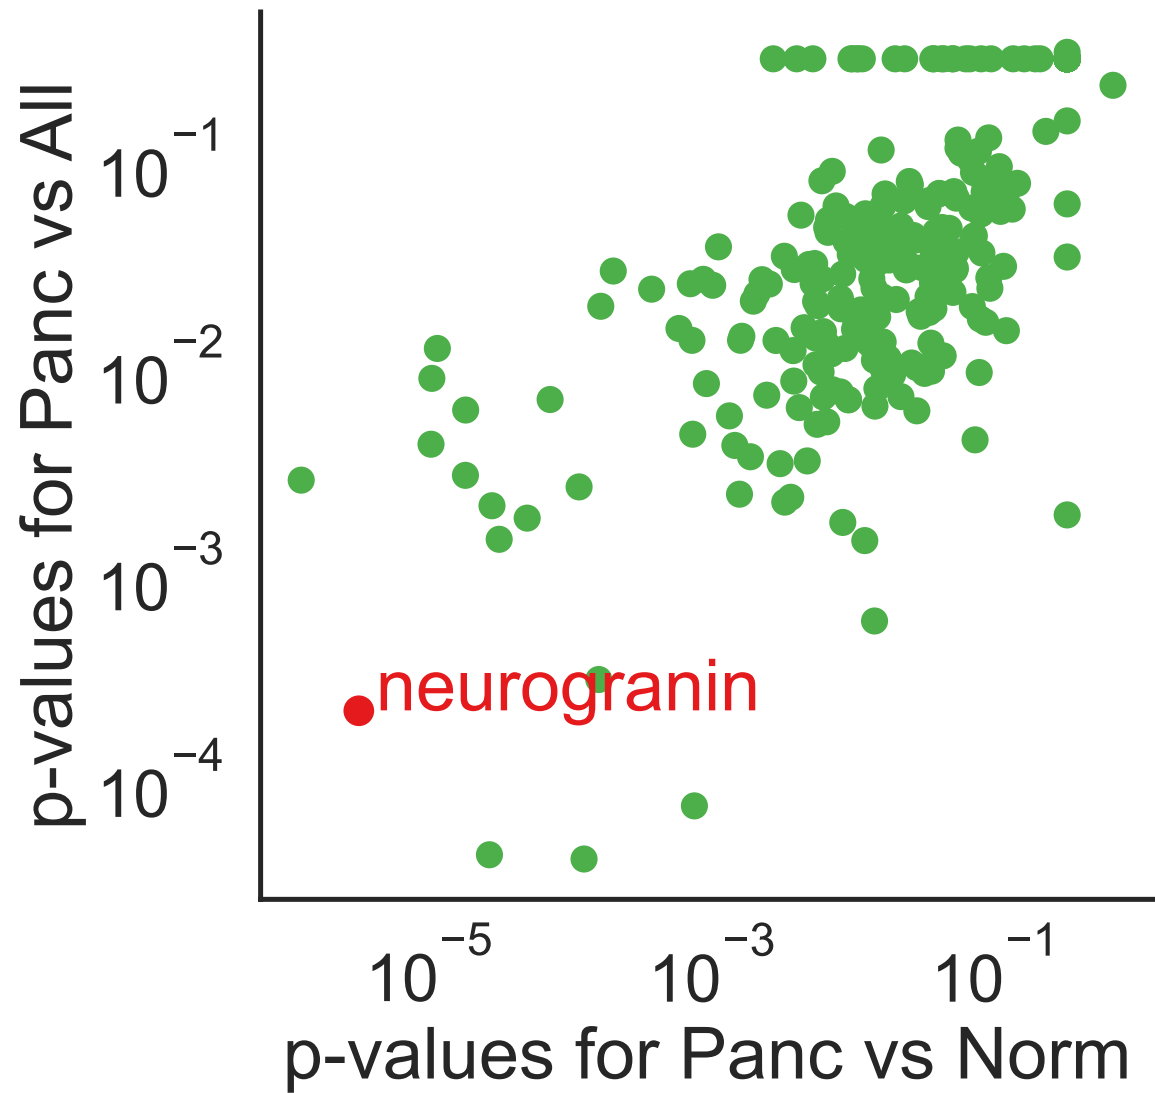

# Biomarker kNN Classification

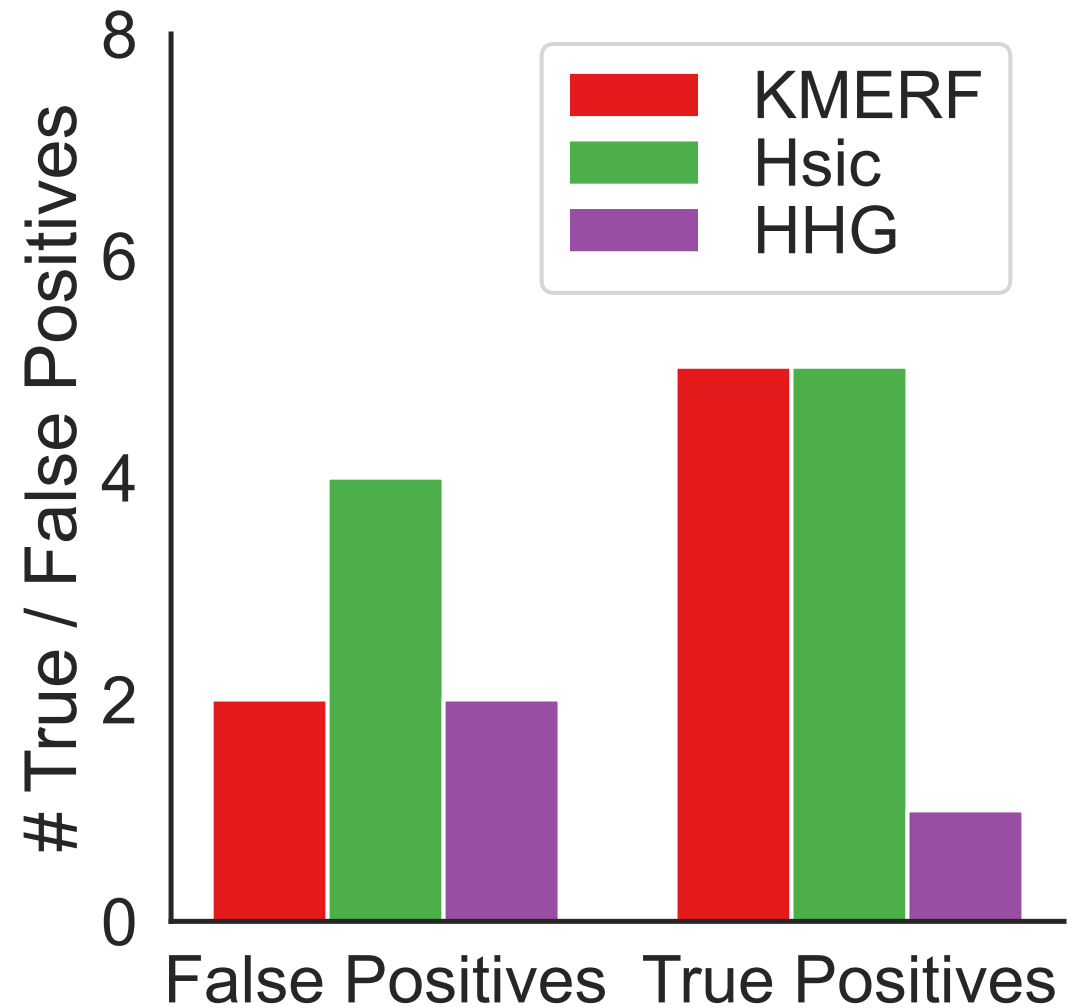

Supplement: supplementary_material [file attachment]
